**A putative enoyl-CoA hydratase contributes to biofilm formation and the antibiotic tolerance of *Achromobacter xylosoxidans***

**Lydia C. Cameron, Benjamin Bonis, Chi Q. Phan<sup>‡</sup>, Leslie A. Kent, Alysha K. Lee<sup>#</sup>, Ryan C. Hunter\***

Department of Microbiology & Immunology, University of Minnesota, 689 23rd Avenue SE, Minneapolis, MN 55455

<sup>‡</sup>Current address: Department of Genome Sciences, University of Washington, 3720 15<sup>th</sup> Ave NE, Seattle WA 98105

<sup>#</sup>Current address: Department of Earth System Science, Stanford University, Stanford, CA 94305

\* To whom correspondence should be addressed:

Ryan C. Hunter  
Department of Microbiology & Immunology  
University of Minnesota  
689 23rd Ave. SE  
Minneapolis, MN 55455  
Tel: (612) 625-1402  
Email: [rchunter@umn.edu](mailto:rchunter@umn.edu)

## 24 **ABSTRACT**

25 *Achromobacter xylosoxidans* has attracted increasing attention as an emerging pathogen in patients with  
 26 cystic fibrosis. Intrinsic resistance to several classes of antimicrobials and the ability to form robust  
 27 biofilms *in vivo* contribute to the clinical manifestations of persistent *A. xylosoxidans* infection. Still, much  
 28 of *A. xylosoxidans* biofilm formation remains uncharacterized due to the scarcity of existing genetic tools.  
 29 Here we demonstrate a promising genetic system for use in *A. xylosoxidans*; generating a transposon  
 30 mutant library which was then used to identify genes involved in biofilm development *in vitro*. We further  
 31 described the effects of one of the genes found in the mutagenesis screen, encoding a putative enoyl-  
 32 CoA hydratase, on biofilm structure and tolerance to antimicrobials. Through additional analysis, we find  
 33 that a cis-2 fatty acid signaling compound is essential to *A. xylosoxidans* biofilm ultrastructure and  
 34 maintenance. This work describes methods for the genetic manipulation of *A. xylosoxidans* and  
 35 demonstrated their use to improve our understanding of *A. xylosoxidans* pathophysiology.

## 36 INTRODUCTION

37 Cystic fibrosis (CF) is caused by mutations in the gene encoding the cystic fibrosis  
38 transmembrane conductance regulator (CFTR) protein that resides at the apical surface of many  
39 epithelial cell types. CFTR defects result in abnormal chloride and bicarbonate transport, increasing  
40 mucus viscosity in the pancreas, paranasal sinuses, digestive tract, and most notably, the lower airways.  
41 Viscous mucus, due to its impaired clearance and nutrient bioavailability, in turn becomes chronically  
42 colonized by pathogenic bacteria that are the leading cause of mortality among the CF population (1).  
43 For decades, *Pseudomonas aeruginosa* and *Staphylococcus aureus* have been extensively  
44 characterized and recognized as the primary airway pathogens. More recently, however, many other  
45 multidrug-resistant opportunistic bacterial species have received attention for their association with CF  
46 disease progression (2).

47 Among them, *Achromobacter xylosoxidans* is notable given its association with poor pulmonary  
48 function scores and apparent patient-to-patient transmissibility (3-5). This aerobic, Gram-negative  
49 opportunistic pathogen has been found to colonize anywhere from 2 to 20 percent of CF subjects,  
50 though its prevalence has risen in recent years (4, 6-11), sparking a renewed interest in its  
51 pathophysiology. Of particular concern is the intrinsic and acquired resistance of *A. xylosoxidans* to  
52 multiple classes of antimicrobial agents, including aminoglycosides, beta-lactams, carbapenems,  
53 chloramphenicol and fluoroquinolones, which presents a significant burden for infection control (7, 8, 12-  
54 15).

55 Also complicating treatment of *A. xylosoxidans* is its ability to form robust biofilms (16-18).  
56 Thought to be the predominant *in vivo* lifestyle among CF pathogens (19), biofilms confer a highly  
57 protective growth environment that shields pathogens against environmental stress, antimicrobials and  
58 the host immune response (20). In addition, nutrient and oxygen gradients throughout microcolonies (or  
59 aggregates)(16) result in slowed metabolism among biofilm cells which can also potentiate drug  
60 tolerance. The recalcitrance of biofilm cells to antibiotic exposure likely enhances the persistence of *A.*  
61 *xylosoxidans* during chronic infection of the CF lung.

62 Relative to canonical CF pathogens, comparatively little is known about the molecular  
63 mechanisms of biofilm formation and maintenance in *A. xylosoxidans*. This is due, in part, to the paucity  
64 of genetic tools available for manipulation of its genome. Therefore, the objectives of this study were two-  
65 fold: First, we sought to develop a tractable system to genetically manipulate *A. xylosoxidans*. Using this  
66 system, our second objective was to take a transposon mutagenesis approach to study the molecular  
67 basis of *A. xylosoxidans* biofilm formation. In doing so, we identified several gene products essential for  
68 biofilm development. We chose to further characterize a gene identified most frequently in our screen  
69 (*echA*) encoding a putative enoyl-CoA hydratase that, when disrupted, leads to a decrease in biofilm  
70 accumulation and increased susceptibility to multiple classes of antibiotics.

71

## 72 RESULTS

73 **Identification of biofilm-defective mutants via transposon mutagenesis.** To identify genetic  
74 determinants of biofilm formation in *A. xylosoxidans*, we generated a mutant library of strain MN001  
75 using random transposon mutagenesis employing the mini-mariner transposable element (21). From this  
76 library, 15,000 mutants were screened for altered biofilm formation using an established crystal violet  
77 (CV) / microtiter dish assay (22). After an initial round of screening, 134 putative biofilm-defective  
78 mutants were identified, and putative hits were then re-tested (n=4) to verify mutant phenotypes. After  
79 secondary screening and eliminating mutants with general growth defects, 31 transposon mutants were  
80 confirmed to be defective in biofilm accumulation (Fig. 1, Table 1).

81 To identify DNA sequences (~200-400 bp) flanking transposon insertion junctions, mutants were  
82 screened by arbitrarily-primed PCR. Insertions were mapped to loci predicted to encode various classes  
83 of gene products, including membrane proteins, glycosyltransferases, flagella, transcriptional regulators,  
84 in addition to several proteins with no assigned function (Table 1). Arbitrary PCR of three transposon  
85 insertion loci generated sequences with no homology to published gene sequences, and we were unable  
86 to obtain transposon-flanking sequences for five additional mutants. Of note, a putative enoyl-CoA  
87 hydratase, an exonuclease, and a propionate hydroxylase were each hit multiple times. We took interest  
88 in the gene encoding a putative enoyl-CoA hydratase (Axylo\_0405) given the importance of homologous

89 proteins in fatty acid signal biosynthesis and biofilm development among diverse bacterial species (23-  
90 29). We named this gene *echA* (for enoyl-CoA hydrtase A) and sought to characterize its effects on *A.*  
91 *xylosoxidans* biofilm physiology in greater detail.

92 **Generation and complementation of an *echA* mutant.** Genetic tractability has been challenging for *A.*  
93 *xylosoxidans* due its inherent resistance to multiple classes of antibiotics and inducible efflux system as a  
94 second line of defense (12,13,15). We therefore sought to develop a robust genetic system for the  
95 generation and complementation of marker-free deletion mutants that would facilitate further study of the  
96 genetic basis of biofilm formation. Given that tetracycline resistance was an effective marker to generate  
97 the transposon mutant library, the tetracycline resistance cassette from pEX18tc (30) was PCR amplified  
98 and ligated into the mobilizable suicide vector pSMV8 (31) generating pBMB1 (empty vector) and pBMB2  
99 (*echA* deletion construct; Figure S1). Attempts to construct a complementation vector using broad host-  
100 range cloning plasmids were unsuccessful. We therefore introduced *echA* into pBMB3 (pBBR1MCS-  
101 5::*alcA*) forming pBMB4 (Figure S1), placing *echA* expression under the control of an alcohol-inducible  
102 promoter (32). Using these vectors, we generated a markerless deletion mutant and complement of *A.*  
103 *xylosoxidans* MN001 lacking *echA*.

104 ***A. xylosoxidans* biofilm ultrastructure is mediated by *echA*.** To confirm that the biofilm-deficient  
105 phenotypes of transposon mutants 21-A5, 21-F3, and 86-E10 (Table 1) were a result of mutations in  
106 *echA*, we re-assessed biofilm formation by the markerless  $\Delta echA$  mutant using the CV assay described  
107 above. As before,  $\Delta echA$  exhibited a significant decrease in biofilm biomass accumulation relative to the  
108 wildtype ( $p=0.002$ ) after 72h (Fig. 2). Complementation with pBMB4 restored the wildtype phenotype  
109 ( $p=0.023$ ), confirming a role of *echA* and its gene product in *A. xylosoxidans* biofilm development.

110 Enoyl-CoA hydratases are central to the biosynthesis of a class of fatty acid signaling molecules,  
111 or diffusible signal factors (DSFs), that have been described in diverse bacterial species for their role in  
112 mediating virulence, motility and biofilm development (24-29, 33, 34). In *P. aeruginosa*, for example, the  
113 DSF *cis*-2-decenoic acid (*cis*-DA) is known to play a critical role in biofilm dispersion (24,35). Therefore,  
114 to test whether the observed biofilm impairment phenotype in *A. xylosoxidans* was also mediated by a  
115 DSF-like signaling mechanism, we exogenously added synthetic *cis*-DA (310nM)(35) to the  $\Delta echA$

mutant during biofilm development. Despite having no effect on the WT strain (not shown), addition of cis-DA to  $\Delta echA$  resulted in a significant restoration of biofilm biomass relative to the untreated control ( $p=0.024$ )(Fig. 2). These data suggest that biofilm formation in MN001 is directly mediated by a DSF-like metabolite generated by an enoyl-CoA hydratase.

Since the CV staining approach used in the initial mutant screen relies on a dye that stains not only cells, but all biomass adhering to the microtiter plate, we elected to use additional biofilm assays to further characterize the biofilm phenotype of  $\Delta echA$ , and whether disruption of the putative enoyl-CoA hydratase negatively impacts a specific stage of biofilm development (e.g. attachment, matrix production, maturation). We first used a modified adhesion assay (36) to test for defects in attachment to the surface of a chamber slide. Under static conditions,  $\Delta echA$  exhibited no difference in surface attachment relative to the wildtype, demonstrating that initial stages of biofilm formation are not affected (Fig. 3A). We then used a common colony morphology assay that relies on Congo red staining as a macroscopic means of identifying the capacity for extracellular matrix production (37,38). Over the course of 6 days of growth, biofilm colonies showed no apparent differences in morphology or color between strains, suggesting that the *echA* gene product has negligible effect on matrix production in *A. xylosoxidans*. Finally, we used scanning electron microscopy to visualize microcolony ultrastructure in mature biofilms grown for 72 hours under static conditions (Fig. 3C). Relative to WT, the  $\Delta echA$  mutant exhibited notable phenotypic differences in biofilm architecture, corroborating observations made using the microtiter plate assay. First, the mutant strain demonstrated less robust biofilm growth and reduced surface coverage relative to WT. In addition, higher magnification images revealed a less-dense packing order to mutant biofilm cells, suggesting that cell-cell signaling mediated by enoyl-CoA hydratase-derived metabolite is central to biofilm ultrastructural development in *A. xylosoxidans*.

**$\Delta echA$  exhibits increased susceptibility to antibiotic treatment.** Biofilm-associated bacteria can be orders of magnitude more tolerant to antibacterial compounds than their planktonic counterparts (39). Given its defect in biofilm formation and more diffuse nature of mature microcolonies shown by SEM, we hypothesized that the  $\Delta echA$  mutant would exhibit increased susceptibility to antimicrobial treatment. To test this, mature biofilms were grown statically in 8-chamber coverslip slides for 72h and treated with

various concentrations of two commonly used therapeutics to which *A. xylosoxidans* is tolerant, levofloxacin and tobramycin (Fig. 4). Despite not showing any difference in minimum inhibitory concentrations for planktonic cells of the WT and mutant strains (100 µg/mL for tobramycin; 4 µg/mL for levofloxacin), Live/Dead staining of treated biofilms, visualization by microscopy (Fig. 4A), and quantification of dead biomass (Fig. 4B) revealed a statistically significant increase ( $p < 0.001$ ) in susceptibility of the  $\Delta echA$  biofilm to both antibiotics relative to WT. These data demonstrate a central role of *echA* in biofilm antibiotic tolerance.

## DISCUSSION

*A. xylosoxidans* is recognized as an emerging nosocomial pathogen and is associated with a range of infections, including bacteremia (40), endocarditis (41), meningitis (42), and pneumonia in immunocompromised individuals (43). In addition, the prevalence of *A. xylosoxidans* is now estimated to be as high as 20% among individuals with CF (6-11), which is of increasing concern given its reported correlation to lung function decline (3), patient-to-patient transmissibility (5), and multi-drug resistance phenotypes (12-15). Unfortunately, little is known about the physiology and molecular biology of this pathogen, and a greater understanding is critically needed to inform new treatment strategies. This study is an important step in that direction as it identifies several molecular determinants of biofilm growth, thought to play a critical role in the persistence and pathogenesis of *A. xylosoxidans* in the CF airways (16).

The inherent and acquired drug resistance of *Achromobacter* spp. not only limits therapeutic approaches but has also led to a paucity of tools (i.e. selection markers) available for molecular biology studies of *A. xylosoxidans* and manipulation of its genome. Here, we systematically screened numerous vectors and determined that among antibiotics tested, only tetracycline and gentamicin resistance markers were compatible with both *E. coli* and *A. xylosoxidans*. Tet<sup>R</sup> and Gent<sup>R</sup> cassettes were then used to generate (to our knowledge) the first transposon mutant library and a null deletion strain in *A. xylosoxidans*, facilitating a detailed study at the molecular level. These tools pave the way for addressing critical questions about the physiology of this bacterium and its role in pathogenesis.

Screening of our transposon library revealed several genetic determinants of biofilm formation.

Statistically, genome coverage in our library was unsaturated (~92%), though 31 hits in genes in diverse functional categories suggests that the regulation of biofilm development in *A.xylosoxidans* integrates a complex network of cellular processes and environmental stimuli. Several homologs of genes identified in this screen have been linked to biofilm formation in other bacteria. For example, *flgB*, encoding a flagellar basal body rod protein, has been implicated in biofilm development in both *Bordetella bronchiseptica* (44) and *P. aeruginosa* (45). It is noteworthy that other flagellar-associated genes are downregulated in *A. xylosoxidans* biofilms relative to planktonically grown cells (46). In addition, LysR family regulators, such as Achromo\_0951 that was identified in our screen, have been implicated in biofilm morphology and mucosal colonization in other respiratory pathogens such as *P. aeruginosa*, *Burkholderia cenocepacia*, and *Klebsiella pneumoniae* (47-49). Further characterization of these and other genes identified in our screen (see Table 1) will undoubtedly generate new insights into the many aspects of *Achromobacter* biofilm physiology that remain uncharacterized.

We took most interest in Axylo\_0405 (*echA*), encoding a putative enoyl-CoA hydratase (one of eight in strain MN001) with homology to Dspl in *P. aeruginosa* (24). Dspl and other bacterial homologs (e.g. RpfF in *X. campestris*)(27) are key enzymes used in the synthesis of diffusible signaling factors (DSFs) that are monounsaturated fatty acids of medium chain length containing a cis-2 double bond thought to be central in their mechanism of action. These metabolites broadly regulate bacterial behaviors such as motility, iron uptake and virulence (50-52), and data presented here adds to the growing appreciation of their widespread role in biofilm development across diverse Gram-negative bacteria. While synthetic cis-DA was able to partially rescue the biofilm defect in  $\Delta echA$ , the specific identity of the fatty acid signal produced by *A. xylosoxidans* remains to be determined. It is also possible that *A. xylosoxidans* may respond to multiple DSF-like signals produced endogenously or exogenously, as interspecies signaling mediated by cis-2 fatty acids has also been reported (28). Ongoing work is now aimed at characterizing the signal structure, its biosynthetic pathway, sensing mechanism(s) and downstream phenotypic effects in addition to biofilm development.



Respiratory pathogens that adopt a biofilm lifestyle *in vivo* exist in a protective environment against antimicrobials and host defense mechanisms. Furthermore, biofilm cells generally reduce their metabolic activity relative to planktonic cells, further enhancing their intrinsic resistance to therapy. *A. xylosoxidans* has been shown to form robust biofilms both *in vivo* and *in vitro* (16,18), which is corroborated by microscopy data presented here. However, our data demonstrating a heightened susceptibility of  $\Delta echA$  to antibiotic treatment suggest that interfering with fatty acid-mediated cell-cell signaling may represent a viable approach to managing *A. xylosoxidans* biofilms in the lower airways, particularly when used in combination with conventional CF antibiotics. Here we elected to test two compounds to which *A. xylosoxidans* has high resistance, levofloxacin and tobramycin (53), though it will be interesting to test whether this effect holds true for other antibiotics with different mechanisms of action.

In summary, we developed a robust genetic system for use in *A. xylosoxidans* that we leveraged to generate a transposon mutant library. Further study of this library revealed a suite of genes essential for biofilm development *in vitro* and invoked an essential role for a putative enoyl-CoA hydratase in biofilm ultrastructure and tolerance to antimicrobials, likely mediated by a cis-2 fatty acid signaling compound. While a clear picture of the clinical impact of *A. xylosoxidans* in CF airway disease is only beginning to emerge, the continued study of the molecular basis of its biofilm formation and physiology will undoubtedly lead to improved treatment strategies for this important respiratory pathogen.

## METHODS

**Bacterial strains, plasmids, and growth conditions.** Bacterial strains used are listed in Table S1. *A. xylosoxidans* MN001 (54) and *Escherichia coli* were grown in lysogeny broth (LB) at 37°C unless otherwise specified. When necessary, growth media were supplemented with gentamicin at 20 µg/ml (*E. coli*) or 100 µg/ml (*A. xylosoxidans*), ampicillin at 100 µg/ml (*E. coli*) or 300 µg/ml (*A. xylosoxidans*), carbenicillin (300 µg/ml), tetracycline (300 µg/ml), or chloramphenicol (30 µg/ml). *E. coli* strain  $\beta$ 2155 was supplemented with 60 mM diaminopimelic acid (DAP).

**Transposon mutagenesis.** The transposon delivery vector pTnTet containing the hyperactive mariner transposon (21) was introduced by transformation into the *E. coli* donor bacterial strain  $\beta$ 2155 (55). *A. xylosoxidans* MN001 and *E. coli*  $\beta$ 2155 (carrying pTnTet) were grown overnight in LB and LB containing chloramphenicol (30mg/ml) and 60 mM DAP, respectively, at 37°C. Cells were combined in a donor-to-recipient ratio of 5:1, centrifuged at 4000 x g for 5 minutes, resuspended in 200 mL fresh LB-DAP and spot-plated (10  $\mu$ L) onto LB agar. Mating proceeded for 8h at 37°C, at which point cells were harvested and resuspended in 1 mL of LB. Cell suspensions were diluted 1:5, and 100 mL aliquots were plated on LB-tetracycline agar and allowed to grow for 48h at 37°C. Colonies were randomly selected for downstream biofilm assays.

**Biofilm microtiter plate assay.** To identify determinants of biofilm development, transposon mutants were screened using a modified crystal violet (CV) assay approach described previously (22). Briefly, individual mutants were transferred to single wells of a 96-well microtiter plate containing 200  $\mu$ L LB per well, and incubated while shaking at 37°C. Following 24h of growth, 2  $\mu$ L was transferred to 198  $\mu$ L ABT medium [15mM (NH<sub>4</sub>)<sub>2</sub>SO<sub>4</sub>, 40mM Na<sub>2</sub>HPO<sub>4</sub>, 20mM KH<sub>2</sub>PO<sub>4</sub>, 50mM NaCl, 1mM MgCl<sub>2</sub>, 0.1 mM CaCl<sub>2</sub> and 0.01 mM FeCl<sub>3</sub> supplemented with 0.5% casamino acids and 0.5% glucose](25) in a new microtiter plate, and grown for an additional 24h at 37°C in a humidified chamber. Plates were first measured spectrophotometrically (OD<sub>600</sub>) to determine culture cell density. Supernatants were discarded, and plates were washed 3X with ultrapure water. Plates were dried in a biosafety hood for 2.5h and stained with 200  $\mu$ L of 0.1% CV for 20 minutes. Plates were then washed 5X to remove excess stain, air-dried for 4h, and 200  $\mu$ L 30% acetic acid was added to each well. Following a 15 min incubation, CV absorbance was measured spectrophotometrically (OD<sub>560</sub>) and normalized to culture density. Wells exhibiting less than 50% absorbance than the wildtype (MN001) were considered putative hits (134 total) and were subjected to a secondary screen using the same protocol (n=4 for each mutant). Transposon mutants showing a significant reduction in biofilm growth (31 total, as determined by a Mann-Whitney U test) were stored for further characterization.

Biofilm growth of MN001, its  $\Delta echA$  derivative and complemented strain (see below) were also tested using the same microtiter assay. In these experiments, growth medium was supplemented with

250 2% ethanol to drive expression of the *alcA* promoter in pBMB4 (below). When indicated, *cis*-2-decenoic  
251 acid (F13807D, Carbosynth) was also added at a concentration of 310nM (35).

252 **Arbitrary PCR and mutant sequencing.** An arbitrary-PCR-based approach (22) was used to identify  
253 sequences flanking transposon insertion sites. The PCR method involved two rounds of reactions, with  
254 the first using a primer unique for the mariner transposon and one degenerate primer (pair 1, Table  
255 S2)(56). The second round included nested primers (pair 2) unique to the transposon and 5' end of the  
256 arbitrary primer for amplification of PCR products obtained in the first round. PCR products were  
257 sequenced at the University of Minnesota Genomics Center (UMGC) and were mapped to the *A.*  
258 *xylosoxidans* MN001 genome (Accession#PRJNA288995).

259 **Construction and complementation of an *echA* deletion mutant.** To generate a deletion vector  
260 compatible with *A. xylosoxidans*, pSMV8 (57) was first digested using *Apal*. A tetracycline resistance  
261 cassette was then amplified from pEX18tc (31) using primer pair 3 (Table S2) and digested with *Apal*.  
262 Vector and insert (1:3 ratio) were then ligated using T4 ligase, transformed into *E. coli* UQ950 and  
263 selected for on LB agar containing tetracycline (15 µg/mL). Colonies were screened using primers M13F  
264 and TetR (pair 4) to confirm insertion orientation. One plasmid, pBMB1, was selected for further use.

265 To generate an in-frame, unmarked deletion of Achromo51\_0405 (*echA*), ~1kb sequences  
266 flanking *echA* were PCR amplified using primer pairs 5 and 6 (Table S2). These flanking regions were  
267 combined and cloned into pBMB1 digested with *SpeI* and *XhoI* using Gibson assembly, resulting in  
268 pBMB2 (Figure S1). This plasmid was then chemically transformed into UQ950, and positive ligations  
269 were screened by PCR. pBMB2 was then transformed into *E. coli* strain WM3064 and mobilized into *A.*  
270 *xylosoxidans* MN001 by conjugation. Recombinants were selected for on LB-tetracycline agar and  
271 double recombinants were selected for on LB agar containing 6% sucrose.

272 Complementation was achieved via exogenous expression of *echA* (Ax\_0405) from pBBR1MCS-  
273 5 (57). To do so, an alcohol inducible promoter, *alcA* (32) was first amplified from pGGA008 using  
274 primers *alcA\_F* and *alcA\_R* (Table S2) before digestion with restriction enzymes *HindIII* and *BamHI*.  
275 Ligation into similarly digested pBBR1MCS-5 yielded pBMB3 (pBBR1MCS-5::*alcA*). *echA* was then  
276 amplified from *A. xylosoxidans* MN001 genomic DNA using primers *echA\_F* and *echA\_R*, and digested

with BamHI and SacI before ligation into pBMB3 using T4 ligase. The resulting vector, pBMB4 (pBBR1MCS-5::alcAechA; Figure S1), was transformed into *E. coli* UQ950. This vector was then introduced into *A. xylosoxidans* MN001 via conjugation with an *E. coli* donor strain WM3064, and transconjugants were selected on LB agar containing 300 µg/mL gentamicin sulfate. All constructs and positive transformants were verified by Sanger sequencing.

**Attachment assay.** A modified attachment assay (36) was used to assess early attachment of *A. xylosoxidans* to a polystyrene substratum. Briefly, MN001 and its  $\Delta echA$  derivative were grown for 18h at 37°C in ABT followed by dilution 1:100 into fresh medium. Cells were then grown to mid-log phase ( $OD_{600} = 0.6$ ) before dilution in ABT to an  $OD_{600}$  of 0.1. 200 µl of each culture was added to an 8-chamber coverslip slide (Ibidi, #80824) and incubated at 37°C for 1h. Following incubation, slides were rinsed twice with 200 µl of PBS to remove unattached biomass, and attached cells were stained using SYTO 9 (Invitrogen) in PBS according the manufacturer's protocol. Substrata were imaged using an Olympus IX83 inverted fluorescence microscope with a transmitted Koehler illuminator and a 40X objective lens (Olympus). Four images per strain per biological replicate (n=4) were captured on a Hamamatsu ORCA camera, and post-acquisition analysis was performed using FIJI software (58) by calculating the integrated density of SYTO 9.

**Colony biofilm assay.** MN001 and  $\Delta echA$  were grown overnight in LB medium, diluted 1:1000, and 10µL was spotted on nutrient agar containing 1% tryptone, 1% agar, 20µg/mL Coomassie Brilliant Blue, and 40 µg/mL Congo red (36). Plates were incubated at 37°C for 6 days and monitored daily for colony morphology.

**Scanning electron microscopy.** Overnight cultures were diluted 1:10 in fresh LB medium and were added to 48-well microtiter plates containing autoclaved Aclar fluoropolymer film (Electron Microscopy Sciences, Hatfield, PA). Biofilms were grown for 48 h at 37°C, shaking at 50 rpm, and prepared for SEM using cationic dye stabilization methods (59,60). Briefly, Aclar membranes containing biofilm growth were washed three times in 0.2M sodium cacodylate buffer, and submerged in primary fixative (0.15M sodium cacodylate buffer, pH 7.4, 2% paraformaldehyde, 2% glutaraldehyde, 4% sucrose, 0.15% alcian blue 8 GX) for 22h. Samples were washed three more times prior to a 90 minute treatment with secondary

304 fixative (1% osmium tetroxide, 1.5% potassium ferrocyanide, 0.135M sodium cacodylate, pH 7.4). After  
 305 three final washes, biofilms were chemically dehydrated in a graded ethanol series (25, 50, 70, 85, 95  
 306 [2x] and 100% [2x]) before CO<sub>2</sub>-based critical point drying. Aclar membranes were attached to SEM  
 307 specimen mounts using carbon conductive adhesive tape and sputter coated with ~5nm iridium using the  
 308 Leica ACE 600 magnetron-based system. Biofilms were imaged using a Hitachi S-4700 field emission  
 309 SEM with an operating voltage of 2kV.

310 **Antibiotic challenge.** Biofilm antimicrobial susceptibility testing was performed using a chamber slide  
 311 assay (61). Briefly, MN001 and  $\Delta echA$  were grown in LB overnight, diluted 1:1000 and grown to an OD<sub>600</sub>  
 312 of 0.6 before dilution to an OD<sub>600</sub> of 0.5. 200 $\mu$ L of each culture was then added to each well of an Ibidi 8-  
 313 chamber coverslip slide and incubated at 37°C in a humidified chamber. After 24h, medium was replaced  
 314 with fresh LB and incubated for an additional 24h. Media was gently aspirated from each well, replaced  
 315 with LB containing either tobramycin or levofloxacin (0, 10, 100, and 1000  $\mu$ g/mL), and incubated at 37°C  
 316 for 6h. Cells were washed in sterile PBS to remove unattached biomass, stained for 15 minutes using the  
 317 BacLight Live/Dead viability assay (Life Technologies, #L7012) and visualized by fluorescent imaging as  
 318 described above. Integrated density for SYTO 9 and propidium iodide (PI) for each image was  
 319 determined using FIJI (58), and percentage of dead biomass was determined by (average integrative  
 320 density of PI)/(average integrated density of PI + integrated density of SYTO 9)(61). Data were  
 321 generated using four biological replicates (n=4).

## ACKNOWLEDGEMENTS

pGGA008 (Addgene plasmid #48817) was a gift from Dr. Jan Lohmann (Heidelberg). We thank Clayton Summitt for assistance with data analysis and other members of the Hunter lab for critical review of the manuscript. Parts of this work were carried out in the Characterization Facility, University of Minnesota, which receives partial support from NSF through the Materials Research Science and Engineering Centers (MRSEC) program. This study was supported by the University of Minnesota, a NHLBI Pathway to Independence award to RCH, American Society for Microbiology Undergraduate Research Fellowships to AKL and LAK.

**AUTHOR CONTRIBUTIONS.** L.C. performed experiments, created figures, and helped write and edit the manuscript. B.B. performed experiments, created figures, and helped edit the manuscript. C.P. and A.L. performed experiments. L.K. performed SEM experiments and created figures. R.H. contributed to the conception, experimental design, data interpretation, statistical analyses, and manuscript preparation.

**COMPETING INTERESTS STATEMENT.** The authors declare no competing interests.

**DATA AVAILABILITY.** All data generated during and/or analyzed during the current study are included in this article, its supplementary information files, or are available from the corresponding author on reasonable request.

## REFERENCES

1. Gibson, R.L., Burns, J.L. & Ramsey B.W. Pathophysiology and management of pulmonary infections in cystic fibrosis. *Am. J. Respir. Crit. Care. Med.* **168**, 918-951 (2003).
2. Salsgiver, E.L. et al. Changing epidemiology of the respiratory bacteriology of patients with cystic fibrosis. *Chest.* **149**(2), 390-400 (2016).
3. Ridderberg, W., Bendstrup, K.E., Olesen, H.V., Jensen-Fangel, S. & Nørskov-Lauritsen, N. Marked increase in incidence of *Achromobacter xylosoxidans* infections caused by sporadic acquisition from the environment. *J. Cyst. Fibros.* **10**, 466-469 (2011).
4. Rønne Hansen, C., Pressler, T., Høiby, N. & Gormsen, M. Chronic infection with *Achromobacter xylosoxidans* in cystic fibrosis patients; a retrospective case control study. *J. Cyst. Fibros.* **5**(4), 245-251 (2006).
5. Van Daele, S. et al. Shared genotypes of *Achromobacter xylosoxidans* strains isolated from patients at a cystic fibrosis rehabilitation center. *J. Clin. Microbiol.* **43**, 2998-3002 (2005).



6. Burns, J.L. et al. Microbiology of sputum from patients at cystic fibrosis centers in the United States. *Clin. Infect. Dis.* **27**, 158-163 (1998).
7. Tan, K., Conway, S.P., Brownlee, K.G., Etherington, C. & Peckham, D.G. *Alcaligenes* infection in cystic fibrosis. *Pediatr. Pulmonol.* **34**, 101-104 (2002).
8. Raso, T., Bianco, O., Grosso, B., Zucca, M. & Savoia, D. *Achromobacter xylosoxidans* respiratory tract infections in cystic fibrosis patients. *APMIS* **116**, 837-841 (2008).
9. Pereira, R.H. et al. Patterns of virulence factor expression and antimicrobial resistance in *Achromobacter xylosoxidans* and *Achromobacter ruhlandii* isolates from patients with cystic fibrosis. *Epidemiol. Infect.* **145**, 600-606 (2017).
10. De Baets, F., Schelstraete, P., Van Daele, S., Haerynck, F. & Vaneechoutte, M. *Achromobacter xylosoxidans* in cystic fibrosis: Prevalence and clinical relevance. *J. Cyst. Fibros.* **6**, 75-78 (2007).
11. Amoureux, L. et al. Detection of *Achromobacter xylosoxidans* in hospital, domestic, and outdoor environmental samples and comparison with human clinical isolates. *Appl. Environ. Microbiol.* **79**, 7142-7149 (2013).
12. Bador, J., Amoureux, L., Blanc, E. & Neuwirth, C. Innate aminoglycoside resistance of *Achromobacter xylosoxidans* is due to *axyXY-oprZ*, an RND-type multidrug efflux pump. *Antimicrob. Agents Chemother.* **57**, 603-605 (2013).
13. Bador, J. et al. First description of an RND-type multidrug efflux pump in *Achromobacter xylosoxidans*, AxyABM. *Antimicrob. Agents Chemother.* **55**, 4912-4914 (2011).
14. Amoureux, L. et al. Epidemiology and resistance of *Achromobacter xylosoxidans* from cystic fibrosis patients in Dijon, Burgundy: First French data. *J. Cyst. Fibros.* **12**, 170-176 (2013).
15. Rolston, K.V. & Messer, M. The *in-vitro* susceptibility of *Alcaligenes denitrificans* subsp. *xylosoxidans* to 40 antimicrobial agents. *J. Antimicrob. Chemother.* **26**, 857-860 (1990).
16. Nielsen, S.M., Nørskov-Lauritsen, N., Bjarnsholt, T. & Meyer, R.L. *Achromobacter* species isolated from cystic fibrosis patients reveal distinctly different biofilm morphotypes. *Microorganisms* **4**, (2016).
17. Hansen, C.R. et al. Inflammation in *Achromobacter xylosoxidans* infected cystic fibrosis patients. *J. Cyst. Fibros.* **9**, 51-58 (2010).
18. Jakobsen, T.H. et al. Complete genome sequence of the cystic fibrosis pathogen *Achromobacter xylosoxidans* NH44784-1996 complies with important pathogenic phenotypes. *PLoS One* **8**, :e68484 (2013).
19. Bjarnsholt, T. et al. The *in vivo* biofilm. *Trends Microbiol.* **21**, 466-474 (2013).
20. Stewart, P.S., & Costerton, J.W. Antibiotic resistance of bacteria in biofilms. *Lancet* **358**, 135-138 (2001).
21. Chiang, S.L. & Rubin, E.J. Construction of a mariner-based transposon for epitope-tagging and genomic targeting. *Gene* **296**, 179-185 (2002).

22. O'Toole, G.A. et al. Genetic approaches to study of biofilms. *Methods Enzymol.* **310**, 91-109 (1999).
23. Wang, L.H. et al. A bacterial cell-cell communication signal with cross-kingdom structural analogues. *Mol. Microbiol.* **51**, 903-912 (2004).
24. Amari, D.T., Marques, C.N.H. & Davies, D.G. The putative enoyl-coenzyme A hydratase Dspl is required for production of the *Pseudomonas aeruginosa* biofilm dispersion autoinducer *cis*-2-decenoic acid. *J. Bacteriol.* **195**, 4600-4610 (2013).
25. Ionescu, M. et al. Promiscuous diffusible signal factor production and responsiveness of the *Xylella fastidiosa* Rpf system. *mBio.* **7**, e01054-16 (2016).
26. Newman, K.L., Almeida, R.P.P., Purcell, A.H. & Lindow, S.E. Cell-cell signaling controls *Xylella fastidiosa* interactions with both insects and plants. *Proc. Nat. Acad. Sci. USA* **101**, 1737-1742 (2004).
27. Dow, J.M. et al. Biofilm dispersal in *Xanthomonas campestris* is controlled by cell-cell signaling and is required for full virulence to plants. *Proc. Nat. Acad. Sci. USA* **100**, 10995-11000 (2003).
28. Boon, C. et al. A novel DSF-like signal from *Burkholderia cenocepacia* interferes with *Candida albicans* morphological transition. *ISME J.* **2**, 27-36 (2003).
29. Huang, T.P. & Lee Won, A.C. Extracellular fatty acids facilitate flagella-independent translocation by *Stenotrophomonas maltophilia*. *Res. Microbiol.* **158**, 702-711 (2007).
30. Kovach, M.E. et al. Four new derivatives of the broad-host-range cloning vector pBBR1MCS, carrying different antibiotic-resistance cassettes. *Gene* **166**, 175-176 (1995).
31. Hoang, T.T., Karkhoff-Schweizer, R.R., Kutchma, A.J. & Schweizer, H.P. A broad-host-range Flp-FRT recombination system for site-specific excision of chromosomally-located DNA sequences: Application for isolation of unmarked *Pseudomonas aeruginosa* mutants. *Gene* **212**, 77-86 (1998).
32. Lampropoulos, A. et al. Greengate---a novel, versatile, and efficient cloning system for plant transgenesis. *PLoS One* **8**, e83043 (2013).
33. Deng, Y. et al. *Cis*-2-dodecenoic acid receptor RpfR links quorum-sensing signal perception with regulation of virulence through cyclic dimeric guanosine monophosphate turnover. *Proc. Nat. Acad. Sci. USA* **109**, 15479-15484 (2012).
34. Barber, C.E. et al. A novel regulatory system required for pathogenicity of *Xanthomonas campestris* is mediated by a small diffusible signal molecule. *Mol. Microbiol.* **24**, 555-566 (1997).
35. Davies, D.G. & Marques, C.N.H. A fatty acid messenger is responsible for inducing dispersion in microbial biofilms. *J. Bacteriol.* **191**, 1393-1403 (2009).
36. Ramsey, M.M. & Whiteley, M. *Pseudomonas aeruginosa* attachment and biofilm development in dynamic environments. *Mol. Microbiol.* **53**, 1075-1087 (2004).



37. Dietrich, L.E. et al. Bacterial community morphogenesis is intimately linked to the intracellular redox state. *J. Bacteriol.* **195**, 1371-1380 (2013).
38. Jones, C.J. & Wozniak, D.J. Congo red stain identifies matrix overproduction and is an indirect measurement for c-di-GMP in many species of bacteria *In* Sauer K (ed) c-di-GMP signaling. *Meth. Mol. Biol.* Humana Press, New York, NY (2017).
39. Stewart, P.S. & Costerton, J.W. Antibiotic resistance of bacteria in biofilms. *Lancet* **358**, 135-138 (2001).
40. Aisenberg, G., Rolston, K.V. & Safdar, A. Bacteremia caused by *Achromobacter* and *Alcaligenes* species in 46 patients with cancer. *Cancer* **101**, 2134-2140 (2004).
41. Ahmed, M.S. et al. *Achromobacter xylosoxidans*, an emerging pathogen in catheter-related infection in dialysis population causing prosthetic valve endocarditis: a case report and review of literature. *Clin. Nephrol.* **71**, 350-354 (2009).
42. Namnyak, S.S., Holmes, B. & Fathalla, S.E. Neonatal meningitis caused by *Achromobacter xylosoxidans*. *J. Clin. Microbiol.* **22**, 470-471 (1985).
43. Wood, G.C. et al. Treatment of *Achromobacter* ventilator-associated pneumonia in critically ill trauma patients. *Ann. Pharmacother.* **52**, 120-125 (2018).
44. Nicholson, T.L., Conover, M.S. & Deora, R. Transcriptome profiling reveals stage-specific production and requirement of flagella during biofilm development in *Bordetella bronchiseptica*. *PLoS One* **7**, e49166 (2012).
45. De La Fuente-Nunez, C. et al. Antimicrob Agents. *Chemother* **56**, 2696-2704 (2012).
46. Nielsen, S.M., Penstoft, L.N. & Norskov-Lauritsen, N. Motility, biofilm formation and antimicrobial efflux of sessile and planktonic cells of *Achromobacter xylosoxidans*. *Pathogens* **8**, 14 (2019).
47. Hennequin, C. & Forestier, C. *oxyR*, a LysR-type regulator involved in *Klebsiella pneumoniae* mucosal and abiotic colonization. *Infect. Immun.* **77**, 5449-5457 (2009).
48. Cao, H. et al. A quorum sensing-associated virulence gene of *Pseudomonas aeruginosa* encodes a LysR-like transcription regulator with a unique self-regulatory mechanism. *Proc. Natl. Acad. Sci. USA* **98**, 14613-14618 (2001).
49. Bernier, S.P., Nguyen, D.T. & Sokol, P.A. A LysR-type transcriptional regulator in *Burkholderia cenocepacia* influences colony morphology and virulence. *Infect. Immun.* **76**, 38-47 (2008).
50. Huedo, P. et al. Two different *rpf* clusters distributed among a population of *Stenotrophomonas maltophilia* clinical strains display differential diffusible signal factor production and virulence regulation. *J. Bacteriol.* **196**, 2431 (2014).
51. Chatterjee, S. & Sonti, R.V. *rpfF* mutants of *Xanthomonas oryzae* sp. *oryzae* are deficient for virulence and growth under low iron conditions. *Mol. Plant Microbe. Interact.* **15**, 463-471 (2002).
52. Huang, T.P. & Lee Wong, A.C. Extracellular fatty acids facilitate flagella-independent translocation by *Stenotrophomonas maltophilia*. *Res. Microbiol.* **158**, 7002-711 (2007).

53. Abbott, I.J. & Peleg, A.Y. *Stenotrophomonas*, *Achromobacter*, and nonmelioid *Burkholderia* species: antimicrobial resistance and therapeutic strategies. *Sem. Resp. Crit. Care Med.* **36**, 99-110 (2015).
54. Badalamenti, J.P. & Hunter, R.C. Complete genome sequence of *Achromobacter xylosoxidans* MN001, a cystic fibrosis airway isolate. *Genome Announc.* **3** (2015).
55. Dehio, C. & Meyer, M. Maintenance of broad-host-range incompatibility group p and group q plasmids and transposition of tn5 in *Bartonella henselae* following conjugal plasmid transfer from *Escherichia coli*. *J. Bacteriol.* **179**, 538-540 (1997).
56. Larsen, R.A., Wilson, M.M., Guss, A.M. & Metcalf, W.W. Genetic analysis of pigment biosynthesis in *Xanthobacter autotrophicus* py2 using a new, highly efficient transposon mutagenesis system that is functional in a wide variety of bacteria. *Arch. Microbiol.* **178**, 193-201 (2002).
57. Saltikov, C.W., Cifuentes, A., Venkateswaran, K. & Newman, D.K. The *ars* detoxification system is advantageous but not required for As(v) respiration by the genetically tractable *Shewanella* species strain ANA-3. *Appl. Environ. Microbiol.* **69**, 2800-2809 (2003).
58. Schindelin, J. et al. FIJI: An open-source platform for biological-image analysis. *Nat. Methods* **9**, 676-682 (2012).
59. Erlandsen, S.L., Kristich, C.J., Dunny, G.M. & Wells, C.L. High-resolution visualization of the microbial glycocalyx with low-voltage scanning electron microscopy: dependence on cationic dyes. *J. Histochem. Cytochem.* **52**, 1427-1435 (2004).
60. Barnes, A.M., Ballering, K.S., Leibman, R.S., Wells, C.L. & Dunny, G.M. *Enterococcus faecalis* produces abundant extracellular structures containing DNA in the absence of cell lysis during early biofilm formation. *mBio.* **3**, e00193-00112 (2012).
61. Tom, S.K., Yau, Y.C., Beaudoin, T., LiPuma, J.J. & Waters, V. Effect of high-dose antimicrobials on biofilm growth of *Achromobacter* species isolated from cystic fibrosis patients. *Antimicrob. Agents Chemother.* **60**, 650-652 (2016).

## FIGURE LEGENDS

**Figure 1. Biofilm formation by transposon mutants of *A. xylosoxidans* MN001.** Mean crystal violet absorbance for each mutant is expressed relative to the parental wildtype strain. Error bars represent standard deviation of the mean (n=4).

**Figure 2. A putative enoyl-CoA hydratase contributes to *A. xylosoxidans* biofilm formation via biosynthesis of a fatty acid signaling metabolite.** *A. xylosoxidans* biofilms were grown for 72 h, quantified using crystal violet and normalized to cell density (biofilm index). Deletion of *echA* resulted in a significant decrease in biofilm biomass that was restored via complementation and addition of cis-DA. Error bars represent standard error of the mean (n=6 for WT and  $\Delta echA$ ; n=3 for  $\Delta echA$ +pBMB4 and  $\Delta echA$ +cisDA).

**Figure 3. *echA* plays a central role in biofilm ultrastructure in *A. xylosoxidans* MN001.** (a) Early attachment assay for WT and *echA* mutant. Error bars represent standard deviation of the mean for replicate experiments (n=3). (b) Colony biofilms grown on Congo red plates for 6 days revealed no differences in matrix production. (c) Mature biofilms of the WT and mutant were visualized by SEM to examine biofilm architecture (scale bars, top = 30 $\mu$ m, bottom = 10  $\mu$ m). All images shown are representative of experiments performed in biological triplicate (n=3) with similar results.

**Figure 4. Disruption of enoyl-CoA hydratase activity leads to increased antibiotic susceptibility.**

(a) Mature *A. xylosoxidans* biofilms were visualized by fluorescence microscopy after 6h exposure to levofloxacin (100 $\mu$ g/mL) and tobramycin (1000 $\mu$ g/mL). Deletion of *echA* resulted in increased susceptibility to both compounds. (b) Integrative densities of green (live) and red (dead) cells were used to calculate % dead biomass for each biofilm treated with various concentrations of antibiotic (bars represent standard deviation of the mean, n=4 for each treatment).

**Table 1.** List of independent biofilm-defective transposon mutants identified in this study.

| <b>Mutant</b> | <b>Axylo Locus Tag</b> | <b>Annotation</b>                           | <b>Insertion Coordinate</b> |
|---------------|------------------------|---------------------------------------------|-----------------------------|
| 18-C10        | 2959                   | Extracellular serine protease precursor     | 3300783                     |
| 21-A5         | 0405                   | Enoyl-CoA hydratase                         | 458026                      |
| 21-B10        | 2974                   | DoxX family protein                         | 3318225                     |
| 21-F3         | 0405                   | Enoyl-CoA hydratase                         | 458968                      |
| 37-D9         |                        | No sequence                                 |                             |
| 29-D11        | 1017                   | Branched chain amino acid transport protein | 1140377                     |
| 29-F4         | 3436                   | Flagellar basal body rod protein FlgB       | 3820439                     |
| 34-H5         | 1568                   | Carboxymethylenebutenolidase                | 1767696                     |
| 44-D4         |                        | No sequence                                 |                             |
| 45-B11        | 1417                   | Outer membrane protein assembly factor BamD | 1595377                     |
| 52-D3         | 2959                   | Extracellular serine protease precursor     | 3296785                     |
| 56-D9         |                        | No sequence                                 |                             |
| 61-A2         | 4754                   | Hypothetical protein                        | 5265710                     |
| 61-G3         | 0328                   | Hypothetical protein                        | 374132                      |
| 68-D1         | 2959                   | Extracellular serine protease precursor     | 3303694                     |
| 75-D6         | 0867                   | Propionate hydroxylase                      | 961203                      |
| 77-F11        | 2959                   | Extracellular serine protease precursor     | 3302134                     |
| 79-B9         | 0165                   | Glycosyltransferase CsbB                    | 200048                      |
| 83-E10        | 0126                   | Hypothetical protein                        | 152964                      |
| 84-D4         | 0867                   | Propionate hydroxylase                      | 961404                      |
| 86-E10        | 0405                   | Enoyl-CoA hydratase                         | 458180                      |
| 87-B2         | 3872                   | Glycosyltransferase MshA                    | 4315184                     |
| 90-D7         |                        | No sequence                                 |                             |
| 95-D11        | 1003                   | Hypothetical protein                        | 1124527                     |
| 103-G8        | 5298                   | L-asparaginase                              | 5841569                     |
| 114-B2        | 0867                   | Propionate hydroxylase                      | 961364                      |
| 114-E11       |                        | No sequence                                 |                             |
| 115-C6        | 0951                   | LysR family transcriptional regulator DmlR  | 1065410                     |

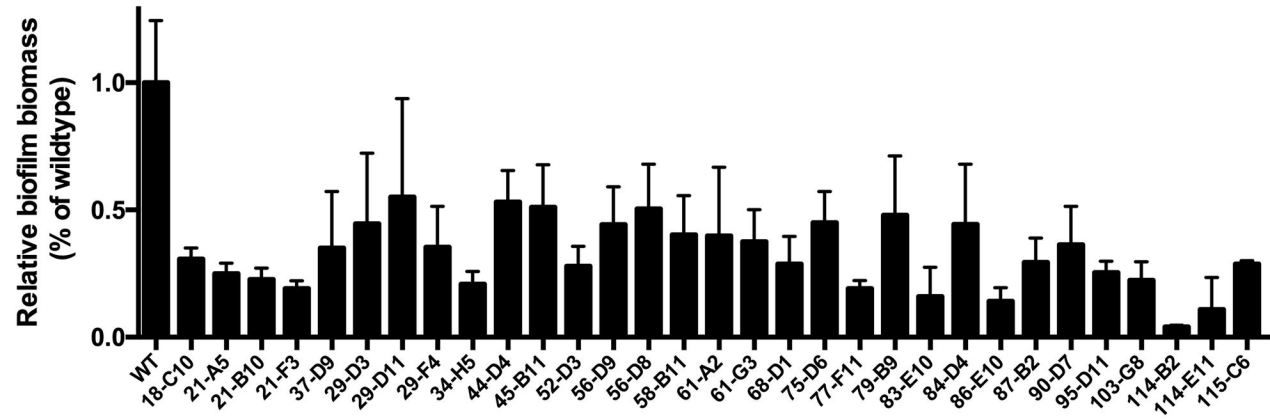

**Biofilm Index vs WT**

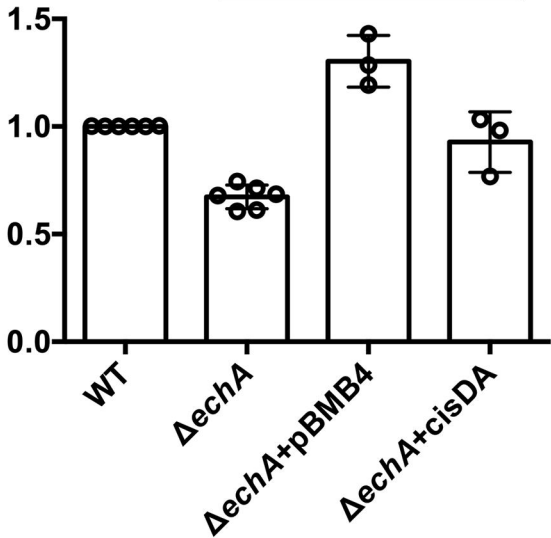

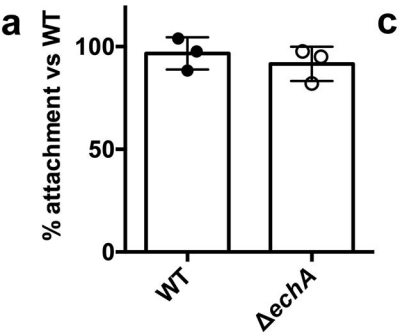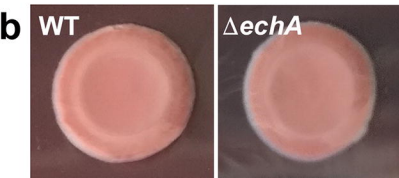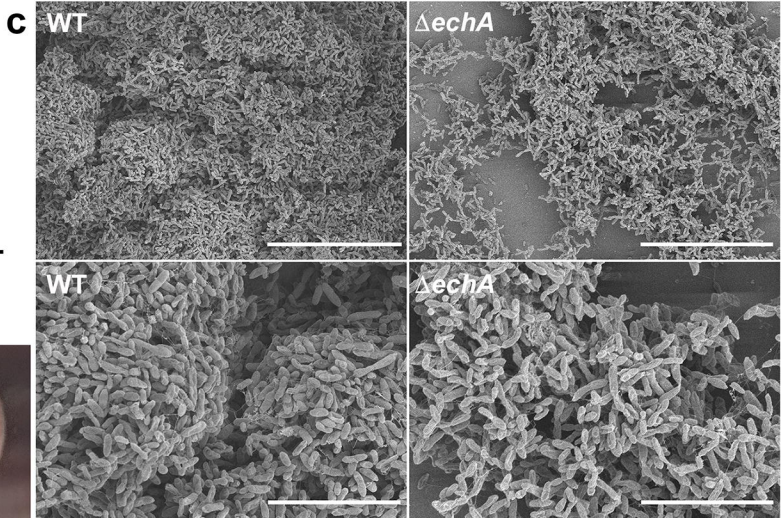



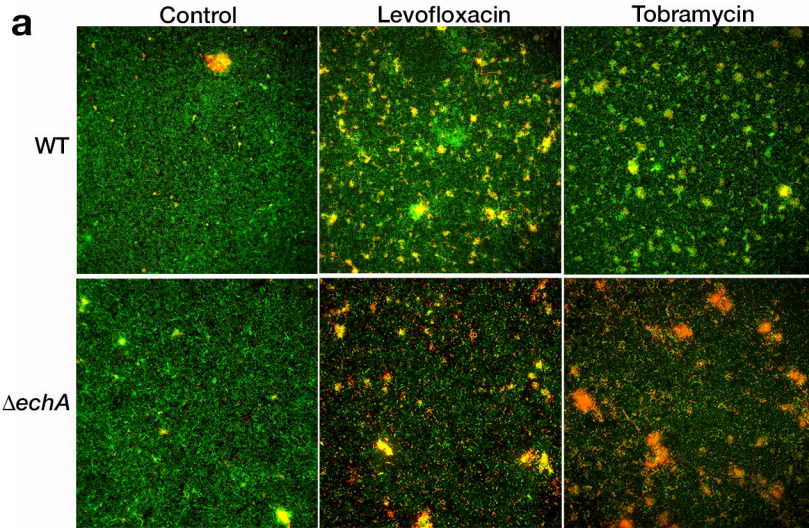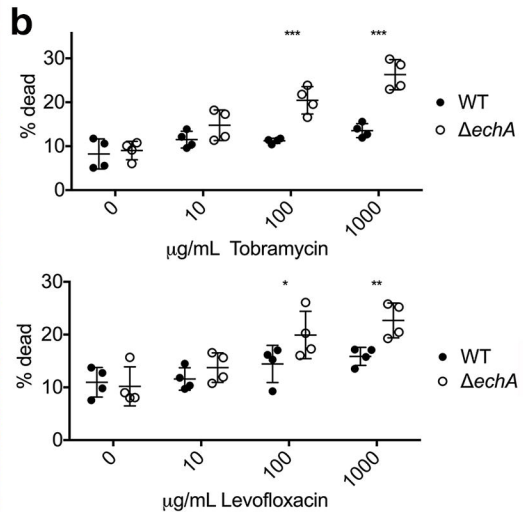

Source: https://www.biorxiv.org/content/10.1101/620559v1.full.pdf
